# Supplementary material
Source: HighWire-hosted journal article supplement (http://erj.ersjournals.com/highwire/filestream/113786/field_highwire_adjunct_files/0/Web_appendix_1_search_strategy.pdf)
Supplement: Web_appendix_1_search_strategy.pdf [file Web_appendix_1_search_strategy.pdf]

## Index of web appendices

1. Complete search strategy
2. Detailed diagnostic and stratification criteria
3. Selected SAS code
4. Tuberculosis incidence rate by year
5. LTBI prevalence in contacts of foreign born index patients
6. Outcomes for each included study by sub-group:
  - 6.1. Tuberculosis prevalence in high income settings
  - 6.2. LTBI prevalence in high income settings
  - 6.3. Tuberculosis incidence in high income settings
  - 6.4. Tuberculosis prevalence in low-middle income settings
  - 6.5. LTBI prevalence in low-middle income settings
  - 6.6. Tuberculosis incidence in low-middle income settings

### 1. Complete search strategy

(tuberculosis[Title] OR "tuberculosis"[MeSH Terms] OR "mycobacterium tuberculosis"[MeSH Terms] OR "tuberculosis, pulmonary"[MeSH Terms]) AND (("contact\$" [All Fields]) OR ("contact tracing"[MeSH Terms]) OR "disease outbreaks"[MeSH Terms] OR "contact\*" [Title] OR "spread" [Title] OR "contact screen\*" [All Fields] OR "contact tracing" [Title] OR "disease transmission" [All Fields] OR "case find\*" [Title] OR (cluster\* [Title] AND analys\* [Title]) OR "household\*" [All Fields] OR "household contact\*" [All Fields] OR ("case finding" [All Fields]) OR ("casefinding" [All Fields]) OR "case detection" [All Fields])

#### Embase search:

'tuberculosis':de OR 'tuberculosis':ti OR 'tuberculosis':ab AND ('contact tracing':ti OR 'contact\$':de OR 'contact tracing':ab OR 'transmission':ti OR 'screening':ti OR 'case detection':ti OR 'case finding':ti OR 'household':ti)

#### LILACS search

(tuberculosis [descriptor] OR tuberculosis) and (contact\$ or contact tracing [descriptor] or surveillance or outbreak [title] or household or cluster analysis [descriptor] or outbreak or spread)

#### Web of Science search

(ts=(tuberculosis) or ti=(tuberculosis) or ts=(Mycobacterium tuberculosis)) AND (ts=(Contact tracing) or ts=(screen\$) or ti=(contact\$) or ti=(tuberculosis contact\$) or ti=(outbreak\$) or ti=(household) or ts=(case finding) or ti=(screening))
